# Supplementary material
Source: PubMed Central journal article supplement (PMC2925518)
Supplement: NIHMS222038-supplement-Asturias_NSMB_Suppl_Final.pdf [file NIHMS222038-supplement-Asturias_NSMB_Suppl_Final.pdf]

## Supplementary Information

### Mediator Head module Structure and Functional Interactions

Gang Cai, Tsuyoshi Imasaki, Kentaro Yamada, Francesco Cardelli, Yuichiro Takagi, and Francisco J. Asturias

#### SUPPLEMENTARY FIGURES

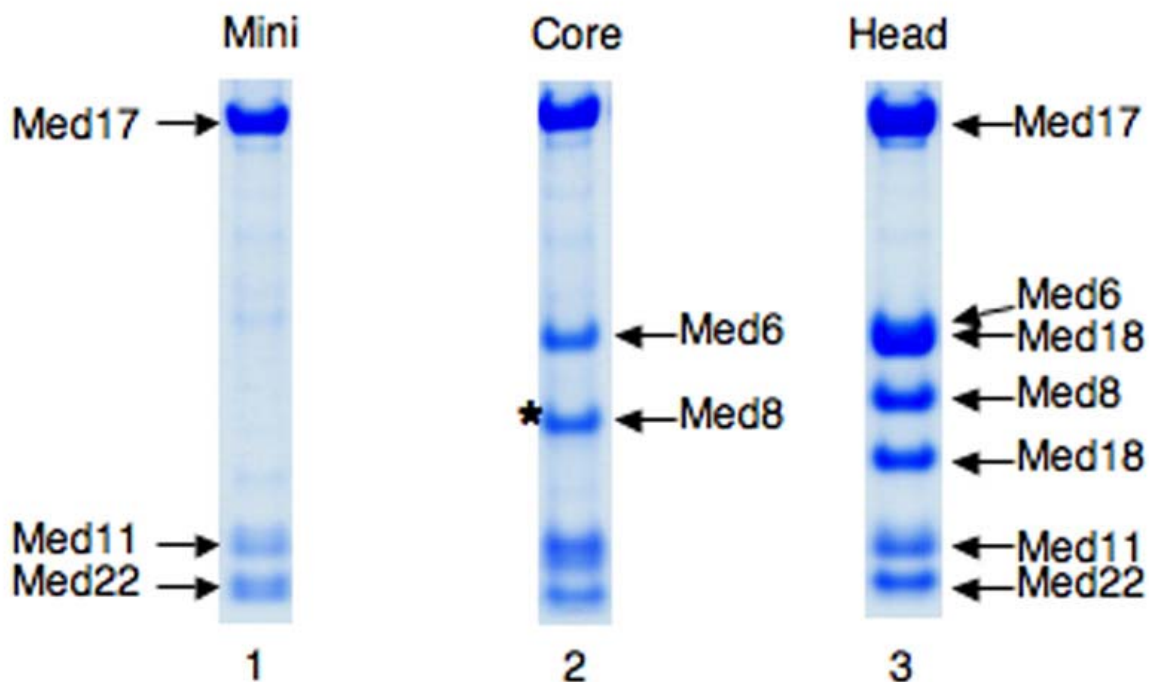

**Supplementary Figure 1. SDS-PAGE analysis of a recombinant Head module and Head module sub-complexes.** The Mediator Head module and its sub-complexes were expressed in insect cells and purified by means of a 10xHis tag on Med17. Protein complexes were resolved by 4-12% NuPAGE and stained with Coomassie blue. The Mini Head module is composed of three subunits: Med17, Med11, and Med22 (lane 1). The Core Head module includes five subunits: Med17, Med6, Med8, Med11, and Med22 (lane 2). The complete Head module is composed of 7 subunits: Med17, Med6, Med18, Med8, Med20, Med11 and Med22 (lane 3). Subunit bands are indicated by arrows. Asterisk indicates apparent slight proteolysis of Med8 in the absence of Med18.

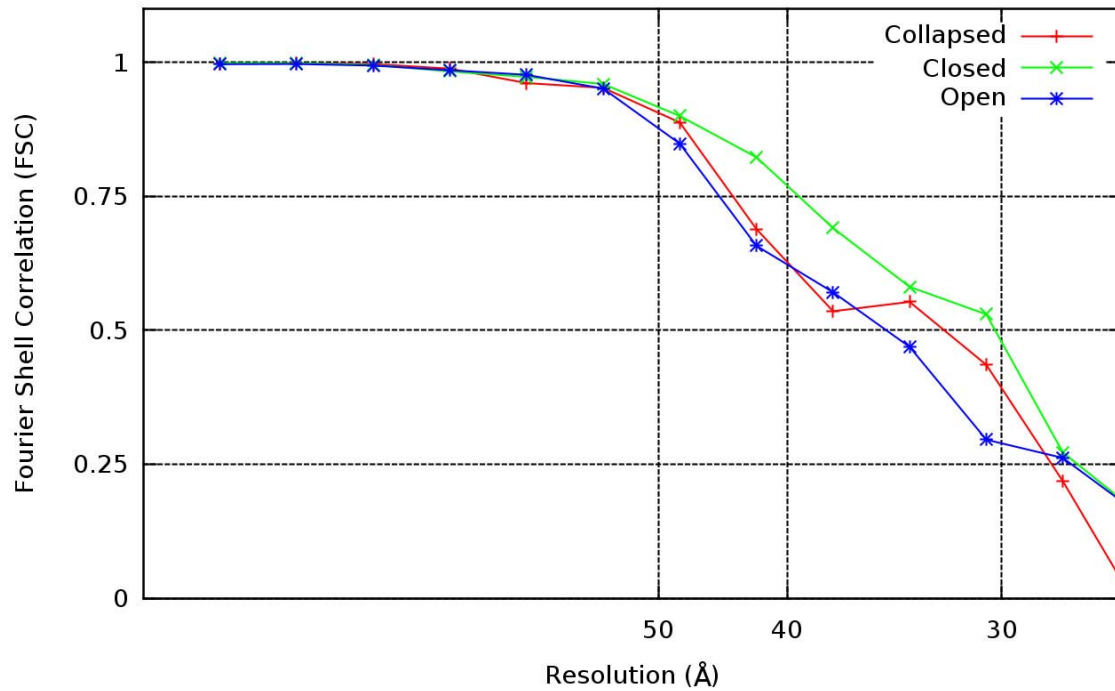

**Supplementary Figure 2. Fourier Shell Correlation (FSC) curves for 3D structures of the different Head module conformations.** Based on the FSC values<sup>1</sup>, the resolution of the reconstructions is estimated to be in the 30-35 Å range.

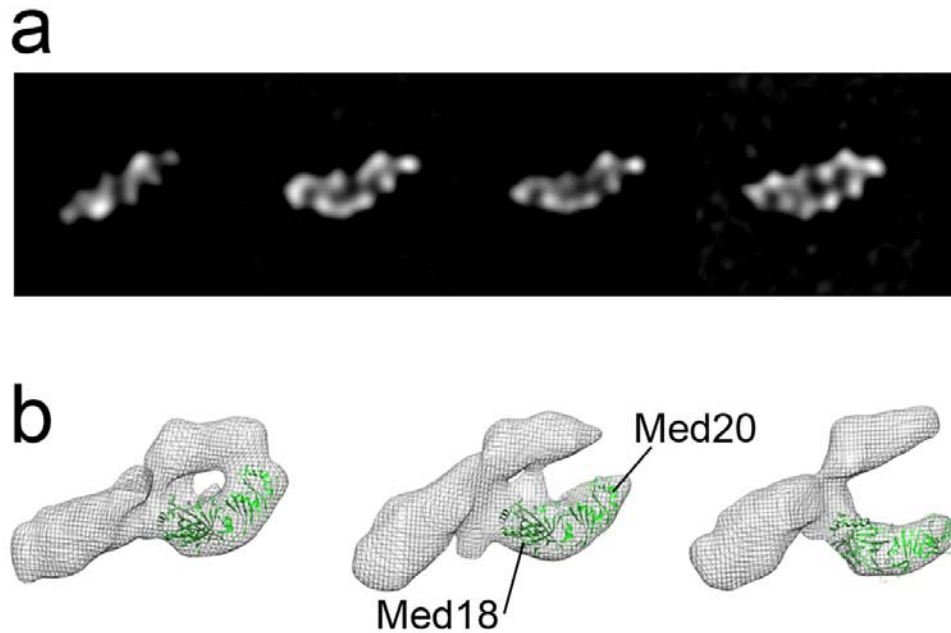

**Supplementary Figure 3. Structure of the Core subcomplex and localization of subunits Med18 and Med20.** (a) Class averages calculated after alignment and classification of Core single particle images show that the Core is found in several distinct orientations on the EM grids. The left-most average corresponds to an orientation similar to that displayed by Head module particles in the collapsed conformation. (b) Docking the X-ray model of the Med18/Med20 subcomplex<sup>2</sup> into the corresponding portion of the Head module 3D EM volumes shows that the X-ray structure closely matches the size and shape of the extended, mobile portion of the Head module volumes.

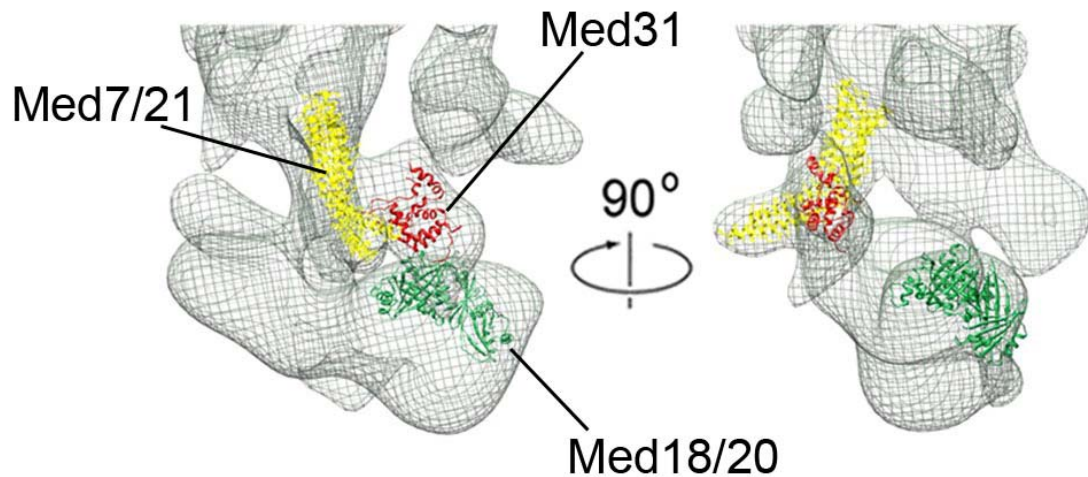

**Supplementary Figure 4. Docking of the Med18/Med20, Med7/Med21, and Med7(N-terminus)/Med31 X-ray structures into the cryo-EM Mediator structure.** X-ray structures of Med18/Med20<sup>2</sup> (green ribbons), Med7/Med21<sup>3</sup> (yellow ribbons), and Med7(N-terminus)/Med31<sup>4</sup> (red ribbons) were docked by matching the respective structures to the Mediator cryo-EM structure<sup>5</sup> (gray mesh). The location of Head module subunits and biochemical information about subunit interactions were also considered in determining the overall location of the Med7/Med21 and Med7(N-terminus)/Med31 subcomplexes.

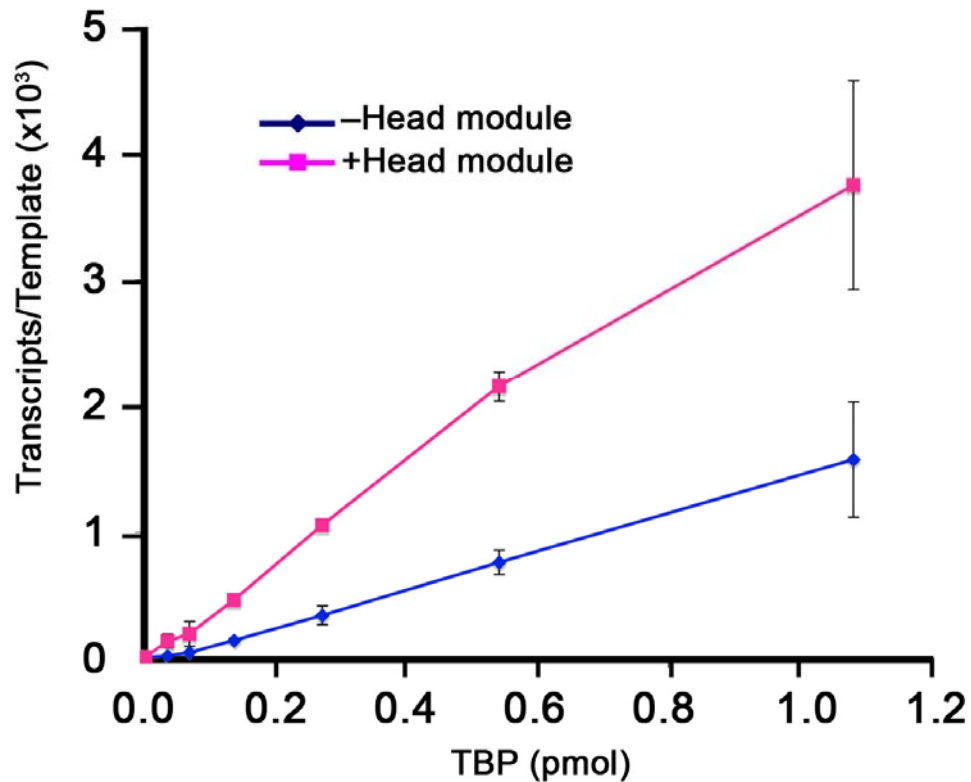

**Supplementary Figure 5. Head module lowers an effective TBP concentration on basal transcription *in vitro*.** *In vitro* reconstituted transcription assay results showing the transcription level dependence on TBP in the absence and in the presence of a recombinant Head Mediator module. Transcription measurements were carried out with purified proteins and a pGCN4 DNA template<sup>6</sup> with increasing amounts of TBP (0, 0.033, 0.067, 0.135, 0.27, 0.54, and 1.08 pmol) in the absence or presence of recombinant Head module. Transcripts (~360 bp) were separated by 6% denaturing PAGE and quantified using fluorescence image analysis. The plot shows the level of transcription activity as a function of the amount of TBP added. The assay was performed in duplicate and standard deviations are indicated as error bars in the figure.

## SUPPLEMENTARY TABLES

**Supplementary Table 1. *S. cerevisiae* strains used in this study**

| Strain | Genotype                                                     | Source          |
|--------|--------------------------------------------------------------|-----------------|
| BY4742 | <i>MATa</i>                                                  | Open Biosystems |
| YT202  | <i>MATa rpb4Δ::KanMX</i>                                     | Open Biosystems |
| YT204  | <i>MATa rpb4Δ::KanMX pYT505 (pRS316-RPB4)</i>                | This study      |
| YT205  | <i>MATa rpb4Δ::KanMX med20Δ::LEU2 pYT505 (pRS316-RPB4)</i>   | This study      |
| YT206  | <i>MATa rpb4Δ::KanMX med18Δ::LEU2 pYT505 (pRS316-RPB4)</i>   | This study      |
| YT218  | <i>MATa rpb4Δ::KanMX med1Δ::LEU2 pYT505 (pRS316-RPB4)</i>    | This study      |
| YT219  | <i>MATa rpb4Δ::KanMX med16Δ::LEU2 pYT505 (pRS316-RPB4)</i>   | This study      |
| YT220  | <i>MATa rpb4Δ::KanMX med31Δ::LEU2 pYT505 (pRS316-RPB4)</i>   | This study      |
| YT221  | <i>MATa rpb4Δ::KanMX med9Δ::LEU2 pYT505 (pRS316-RPB4)</i>    | This study      |
| YT222  | <i>MATa rpb4Δ::KanMX med5Δ::LEU2 pYT505 (pRS316-RPB4)</i>    | This study      |
| YT227  | <i>MATa rpb4Δ::KanMX pYT505 (pRS316-RPB4) pRS415 (empty)</i> | This study      |
| YT228  | <i>MATa pRS316 (empty) pRS415 (empty)</i>                    | This study      |

**Note:** all strains are *his3Δ1 leu2Δ0 lys2Δ0 ura3Δ0*.

## Supplementary References

1. Saxton, W.O. & Baumeister, W. The correlation averaging of a regularly arranged bacterial cell envelope protein. *J. Microsc.* **127**, 127-138 (1982).
2. Lariviere, L. et al. Structure and TBP binding of the Mediator head subcomplex Med8-Med18-Med20. *Nat Struct Mol Biol* **13**, 895-901 (2006).
3. Baumli, S., Hoepfner, S. & Cramer, P. A conserved mediator hinge revealed in the structure of the MED7.MED21 (Med7.Srb7) heterodimer. *J Biol Chem* **280**, 18171-8 (2005).
4. Koschubs, T. et al. Identification, structure, and functional requirement of the Mediator submodule Med7N/31. *Embo J* **28**, 69-80 (2009).
5. Cai, G., Imasaki, T., Takagi, Y. & Asturias, F.J. Mediator structural conservation and implications for the regulation mechanism. *Structure* **17**, 559-67 (2009).
6. Takagi, Y. & Kornberg, R.D. Mediator as a general transcription factor. *J Biol Chem* **281**, 80-9 (2006).
